# Supplementary material for: The P4 Study: Postpartum Maternal and Infant Faecal Microbiome 6 Months After Hypertensive Versus Normotensive Pregnancy
Source: PubMed Central journal article supplement (PMC8860159; doi:10.3389/fcimb.2022.646165), 2022-01-31
Supplement: DataSheet_1.pdf [file DataSheet_1.pdf]

## Supplementary Materials

**Supplementary Table 1: Alpha diversity comparison between mothers and babies**

| Alpha Diversity Index | Baby ( $n = 18$ ) | Mum ( $n = 18$ ) | <i>P</i> value  |
|-----------------------|-------------------|------------------|-----------------|
| Faith's PD            | 13.255            | 34.673           | <b>8.82E-10</b> |
| Shannon's Entropy     | 4.364             | 6.335            | <b>1.76E-09</b> |
| Observed OTUs         | 107.611           | 382.778          | <b>4.29E-07</b> |
| Pielou's Evenness     | 0.651             | 0.741            | <b>2.87E-05</b> |

Abbreviations: PD, phylogenetic diversity; OTU, operational taxonomic unit.

Results are presented as mean  $\pm$  standard deviation.

Significant *P* values calculated from Wilcoxon rank sum test and Benjamini Hochberg correction are in bold.

**Supplementary Table 2: PERMANOVA of beta diversity in mothers and babies based on Bray Curtis dissimilarities**

| Groups            | Df | SS    | F Model | R <sup>2</sup> | <i>P</i> value |
|-------------------|----|-------|---------|----------------|----------------|
| Mothers vs Babies | 1  | 3.987 | 22.497  | 0.398          | <b>0.001</b>   |

Abbreviations: Df, degrees of freedom; SS, sum of squares; F Model, F value by permutation; R<sup>2</sup>, effect size.

Significant *P* values from PERMANOVA with Benjamini Hochberg correction based on 999 permutations are in bold.

**Supplementary Table 3: Alpha diversity comparison between HP and NP mothers**

| Alpha Diversity Index | HP Mum ( $n = 8$ ) | NP Mum ( $n = 10$ ) | <i>P</i> value |
|-----------------------|--------------------|---------------------|----------------|
| Faith's PD            | 36.203             | 33.449              | 0.897          |
| Shannon's Entropy     | 6.288              | 6.372               | 0.897          |
| Observed OTUs         | 377.625            | 386.900             | 0.897          |
| Pielou's Evenness     | 0.738              | 0.744               | 0.897          |

Abbreviations: PD, phylogenetic diversity; OTU, operational taxonomic unit; HP, hypertensive pregnancy; NP, normotensive pregnancy.

Results are presented as mean  $\pm$  standard deviation.

*P* values are calculated from Wilcoxon rank sum test with Benjamini Hochberg correction.

**Supplementary Table 4: PERMANOVA of beta diversity in HP and NP mothers based on Bray Curtis dissimilarities**

| Groups           | Df | SS    | F Model | R <sup>2</sup> | <i>P</i> value |
|------------------|----|-------|---------|----------------|----------------|
| Mum HP vs Mum NP | 1  | 0.110 | 0.859   | 0.051          | 0.617          |

Abbreviations: Df, degrees of freedom; SS, sum of squares; F Model, F value by permutation; R<sup>2</sup>, effect size; HP, hypertensive pregnancy; NP, normotensive pregnancy; PERMANOVA, permutational multivariate analysis of variance.

*P* values are calculated from PERMANOVA with Benjamini Hochberg correction based on 999 permutations.

**Supplementary Table 5: Differential taxa between HP and NP mothers using LEfSe from phylum to species level**

| Taxa                           | Group with higher relative abundance | LDA effect size | LDA effect size Revised | Unadjusted <i>P</i> value | FDR adjusted <i>P</i> value |
|--------------------------------|--------------------------------------|-----------------|-------------------------|---------------------------|-----------------------------|
| g_Bifidobacterium              | HP Mum                               | 2.399           | -2.399                  | <b>0.002</b>              | 0.342                       |
| c_Actinobacteria               | HP Mum                               | 2.399           | -2.399                  | <b>0.003</b>              | 0.342                       |
| p_Actinobacteria               | HP Mum                               | 2.423           | -2.423                  | <b>0.016</b>              | 0.693                       |
| f_Bifidobacteriaceae           | HP Mum                               | 2.399           | -2.399                  | <b>0.002</b>              | 0.342                       |
| s_Bifidobacterium_unclassified | HP Mum                               | 2.111           | -2.111                  | <b>0.026</b>              | 0.693                       |
| g_Barnesiella                  | NP Mum                               | 2.498           | 2.498                   | <b>0.022</b>              | 0.693                       |
| o_Bifidobacteriales            | HP Mum                               | 2.399           | -2.399                  | <b>0.002</b>              | 0.342                       |
| s_Barnesiella_intestinihominis | NP Mum                               | 2.498           | 2.498                   | <b>0.022</b>              | 0.693                       |

Abbreviations: LDA, linear discriminant analysis; LEfSe, Linear discriminant analysis Effect Size; HP, hypertensive pregnancy, NP; normotensive pregnancy.

*P* values from LEfSe are presented as both unadjusted and adjusted with Benjamini Hochberg correction. Significant *P* values are in bold.

**Supplementary Table 6: Alpha diversity comparison between mothers based on smoking status**

| Alpha Diversity Index | Mum No Smoking ( <i>n</i> = 13) | Mum Yes Smoking ( <i>n</i> = 5) | <i>P</i> value |
|-----------------------|---------------------------------|---------------------------------|----------------|
| Shannon's entropy     | 6.308 ± 0.533                   | 6.404 ± 0.5560                  | 1              |
| Faith's PD            | 34.484 ± 9.314                  | 35.163 ± 4.546                  | 1              |
| Pielou's evenness     | 0.741 ± 0.030                   | 0.742 ± 0.048                   | 1              |
| Observed OTUs         | 376.615 ± 105.002               | 398.8 ± 62.432                  | 1              |

Abbreviations: PD, phylogenetic diversity; OTU, operational taxonomic unit.

Results are presented as mean ± standard deviation.

*P* values are calculated from Wilcoxon rank sum test with Benjamini Hochberg correction.

**Supplementary Table 7: Alpha diversity comparison between mothers based on alcohol intake**

| Alpha Diversity Index | Mum No Alcohol ( <i>n</i> = 10) | Mum Yes Alcohol ( <i>n</i> = 8) | <i>P</i> value |
|-----------------------|---------------------------------|---------------------------------|----------------|
| Observed OTUs         | 392.800 ± 92.471                | 370.250 ± 100.325               | 1              |
| Shannon's entropy     | 6.344 ± 0.507                   | 6.323 ± 0.583                   | 1              |
| Faith's PD            | 34.455 ± 8.866                  | 34.945 ± 7.717                  | 1              |
| Pielou's evenness     | 0.739 ± 0.030                   | 0.744 ± 0.041                   | 1              |

Abbreviations: PD, phylogenetic diversity; OTU, operational taxonomic unit.

Results are presented as mean ± standard deviation.

*P* values are calculated from Wilcoxon rank sum test with Benjamini Hochberg correction.

**Supplementary Table 8: Alpha diversity comparison between mothers based on multivitamin intake**

| Alpha Diversity Indices | Mum No Multivitamin ( <i>n</i> = 12) | Mum Yes Multivitamin ( <i>n</i> = 6) | <i>P</i> value |
|-------------------------|--------------------------------------|--------------------------------------|----------------|
| Observed OTUs           | 343.333 ± 91.735                     | 461.667 ± 14.787                     | <b>0.040*</b>  |
| Shannon's entropy       | 6.128 ± 0.526                        | 6.748 ± 0.149                        | 0.071          |

|                   |                |                |       |
|-------------------|----------------|----------------|-------|
| Pielou's evenness | 0.731 ± 0.036  | 0.763 ± 0.019  | 0.071 |
| Faith's PD        | 32.432 ± 7.888 | 39.156 ± 7.213 | 0.125 |

Abbreviations: PD, phylogenetic diversity; OTU, operational taxonomic unit.

Results are presented as mean ± standard deviation.

Significant *P* values calculated from Wilcoxon rank sum test with Benjamini Hochberg correction are in bold.

**Supplementary Table 9: PERMANOVA of beta diversity in mothers grouped according to clinical variables and based on Bray Curtis dissimilarities**

| Groups                                      | Df | SS    | F Model | R <sup>2</sup> | <i>P</i> value |
|---------------------------------------------|----|-------|---------|----------------|----------------|
| Mum No Multivitamin vs Mum Yes Multivitamin | 1  | 0.236 | 1.967   | 0.109          | <b>0.035*</b>  |
| Mum No Smoking vs Mum Yes Smoking           | 1  | 0.193 | 1.580   | 0.090          | 0.083          |
| Mum No Alcohol vs Mum Yes Alcohol           | 1  | 0.130 | 1.030   | 0.060          | 0.418          |

Abbreviations: Df, degrees of freedom; SS, sum of squares; F Model, F value by permutation; R<sup>2</sup>, effect size; PERMANOVA, permutational multivariate analysis of variance. Significant *P* values from PERMANOVA with Benjamini Hochberg correction based on 999 permutations are in bold.

**Supplementary Table 10: Differential genera in mothers based on multivitamin intake in gestation and postpartum**

| Taxa                              | Group with Higher Relative Abundance | LDA Effect Size | LDA Effect Size Revised | Unadjusted <i>P</i> value | FDR adjusted <i>P</i> value |
|-----------------------------------|--------------------------------------|-----------------|-------------------------|---------------------------|-----------------------------|
| g_AF12                            | Yes Multivitamin                     | 2.407           | 2.407                   | <b>0.040</b>              | 0.386                       |
| g_Campylobacter                   | Yes Multivitamin                     | 2.697           | 2.697                   | <b>0.019</b>              | 0.386                       |
| g_Bacteroides                     | No Multivitamin                      | 4.923           | -4.923                  | <b>0.031</b>              | 0.386                       |
| g_unclassified_o_Clostridiales    | Yes Multivitamin                     | 4.243           | 4.243                   | <b>0.019</b>              | 0.386                       |
| g_Butyricoccus                    | No Multivitamin                      | 3.104           | -3.104                  | <b>0.007</b>              | 0.386                       |
| g_Synergistes                     | Yes Multivitamin                     | 2.968           | 2.968                   | <b>0.040</b>              | 0.386                       |
| g_Lachnobacterium                 | Yes Multivitamin                     | 3.227           | 3.227                   | <b>0.034</b>              | 0.386                       |
| g_unclassified_f_Mogibacteriaceae | Yes Multivitamin                     | 2.912           | 2.912                   | <b>0.025</b>              | 0.386                       |
| g_unclassified_f_Ruminococcaceae  | Yes Multivitamin                     | 4.293           | 4.293                   | <b>0.011</b>              | 0.386                       |
| g_Neisseria                       | Yes Multivitamin                     | 2.786           | 2.786                   | <b>0.040</b>              | 0.386                       |
| g_Catenibacterium                 | Yes Multivitamin                     | 2.905           | 2.905                   | <b>0.040</b>              | 0.386                       |
| g_unclassified_o_Streptophyta     | Yes Multivitamin                     | 2.295           | 2.295                   | <b>0.013</b>              | 0.386                       |

|                                    |                     |       |       |              |       |
|------------------------------------|---------------------|-------|-------|--------------|-------|
| g_Oscillospira                     | Yes<br>Multivitamin | 4.173 | 4.173 | <b>0.039</b> | 0.386 |
| g_unclassified_o_RF39              | Yes<br>Multivitamin | 2.961 | 2.961 | <b>0.019</b> | 0.386 |
| g_unclassified_f_Cerasicoccaceae   | Yes<br>Multivitamin | 2.805 | 2.805 | <b>0.006</b> | 0.386 |
| g_unclassified_f_Coriobacteriaceae | Yes<br>Multivitamin | 2.610 | 2.610 | <b>0.037</b> | 0.386 |

Abbreviations: LDA, linear discriminant analysis; LEfSe, Linear discriminant analysis Effect Size.

*P* values from LEfSe are presented as both unadjusted and adjusted with Benjamini Hochberg correction. Significant *P* values are in bold.

**Supplementary Table 11: Differential species in mothers based on multivitamin intake in gestation and postpartum**

| Taxa                               | Group with Higher Relative Abundance | LDA Effect Size | LDA Effect Size Revised | Unadjusted <i>P</i> value | FDR adjusted <i>P</i> value |
|------------------------------------|--------------------------------------|-----------------|-------------------------|---------------------------|-----------------------------|
| s_Synergistaceae_unclassified      | Yes<br>Multivitamin                  | 3.018           | 3.018                   | <b>0.040</b>              | 0.510                       |
| s_unclassified_f_Mogibacteriaceae  | Yes<br>Multivitamin                  | 2.993           | 2.993                   | <b>0.025</b>              | 0.510                       |
| s_AF12_unclassified                | Yes<br>Multivitamin                  | 3.669           | 3.669                   | <b>0.040</b>              | 0.510                       |
| s_Oscillospira_unclassified        | Yes<br>Multivitamin                  | 4.177           | 4.177                   | <b>0.039</b>              | 0.510                       |
| s_Bacteroides_ovatus               | No<br>Multivitamin                   | 4.204           | -4.204                  | <b>0.031</b>              | 0.510                       |
| s_Catenibacterium_unclassified     | Yes<br>Multivitamin                  | 2.920           | 2.920                   | <b>0.040</b>              | 0.510                       |
| s_Ruminococcus_torques             | No<br>Multivitamin                   | 3.160           | -3.160                  | <b>0.025</b>              | 0.510                       |
| s_unclassified_f_Cerasicoccaceae   | Yes<br>Multivitamin                  | 2.946           | 2.946                   | <b>0.006</b>              | 0.510                       |
| s_Lachnobacterium_unclassified     | Yes<br>Multivitamin                  | 3.247           | 3.247                   | <b>0.034</b>              | 0.510                       |
| s_unclassified_f_Ruminococcaceae   | Yes<br>Multivitamin                  | 4.293           | 4.293                   | <b>0.011</b>              | 0.510                       |
| s_unclassified_o_Clostridiales     | Yes<br>Multivitamin                  | 4.243           | 4.243                   | <b>0.019</b>              | 0.510                       |
| s_unclassified_o_RF39              | Yes<br>Multivitamin                  | 3.059           | 3.059                   | <b>0.019</b>              | 0.510                       |
| s_unclassified_f_Coriobacteriaceae | Yes<br>Multivitamin                  | 2.946           | 2.946                   | <b>0.037</b>              | 0.510                       |
| s_Campylobacter_unclassified       | Yes<br>Multivitamin                  | 3.505           | 3.505                   | <b>0.014</b>              | 0.510                       |
| s_unclassified_o_Streptophyta      | Yes<br>Multivitamin                  | 3.451           | 3.451                   | <b>0.013</b>              | 0.510                       |

|                              |                    |       |        |              |       |
|------------------------------|--------------------|-------|--------|--------------|-------|
| s_Butyricoccus_pullicaecorum | No<br>Multivitamin | 3.154 | -3.154 | <b>0.007</b> | 0.510 |
| s_Bacteroides_plebeius       | No<br>Multivitamin | 3.887 | -3.887 | <b>0.006</b> | 0.510 |
| s_Bacteroides_uniformis      | No<br>Multivitamin | 4.342 | -4.342 | <b>0.039</b> | 0.510 |

Abbreviations: LDA, linear discriminant analysis; LEfSe, Linear discriminant analysis Effect Size.

*P* values from LEfSe are presented as both unadjusted and adjusted with Benjamini Hochberg correction. Significant *P* values are in bold.

#### Supplementary Table 12: Alpha diversity comparison between HP and NP babies

| Alpha Diversity Index | HP Baby ( <i>n</i> = 8) | NP Baby ( <i>n</i> = 10) | <i>P</i> value |
|-----------------------|-------------------------|--------------------------|----------------|
| Shannon's entropy     | 3.920                   | 4.719                    | <b>0.031</b>   |
| Pielou's evenness     | 0.608                   | 0.685                    | <b>0.031</b>   |
| Observed OTUs         | 90.375                  | 121.400                  | 0.075          |
| Faith's PD            | 12.800                  | 13.618                   | 0.897          |

Abbreviations: PD, phylogenetic diversity; HP, hypertensive pregnancy; NP, normotensive pregnancy; OTU, operational taxonomic unit.

Results are presented as mean  $\pm$  standard deviation.

Significant *P* values calculated from Wilcoxon rank sum test and Benjamini Hochberg correction are in bold.

#### Supplementary Table 13: PERMANOVA of beta diversity in HP and NP babies on Bray Curtis dissimilarities

| Groups             | Df | SS    | F Model | R <sup>2</sup> | <i>P</i> value |
|--------------------|----|-------|---------|----------------|----------------|
| HP Baby vs NP Baby | 1  | 0.266 | 1.181   | 0.069          | 0.291          |

Abbreviations: Df, degrees of freedom; SS, sum of squares; F Model, F value by permutation; R<sup>2</sup>, effect size; HP, hypertensive pregnancy; NP, normotensive pregnancy.

*P* values are from PERMANOVA with Benjamini Hochberg correction based on 999 permutations.

#### Supplementary Table 14: Differential taxa between HP and NP babies using LEfSe

| Taxa                       | Group with Higher Relative Abundance | LDA effect size | LDA effect size Revised | Unadjusted <i>P</i> value | FDR adjusted <i>P</i> value |
|----------------------------|--------------------------------------|-----------------|-------------------------|---------------------------|-----------------------------|
| s_Clostridium_aldenense    | NP Baby                              | 2.919           | 2.919                   | <b>0.025</b>              | 0.590                       |
| f_Coriobacteriaceae        | NP Baby                              | 2.336           | 2.336                   | <b>0.046</b>              | 0.590                       |
| o_Coriobacteriales         | NP Baby                              | 2.336           | 2.336                   | <b>0.046</b>              | 0.590                       |
| s_Bacteroides_unclassified | NP Baby                              | 4.172           | 4.172                   | <b>0.029</b>              | 0.590                       |
| c_Betaproteobacteria       | NP Baby                              | 2.980           | 2.980                   | <b>0.037</b>              | 0.590                       |
| s_Sutterella_unclassified  | NP Baby                              | 3.020           | 3.020                   | <b>0.034</b>              | 0.590                       |
| s_Streptococcus_infantis   | HP Baby                              | 2.030           | -2.030                  | <b>0.037</b>              | 0.590                       |
| c_Coriobacteriia           | NP Baby                              | 2.336           | 2.336                   | <b>0.046</b>              | 0.590                       |
| p_Bacteroidetes            | NP Baby                              | 4.239           | 4.239                   | <b>0.033</b>              | 0.590                       |
| c_Bacteroidia              | NP Baby                              | 4.227           | 4.227                   | <b>0.033</b>              | 0.590                       |

|                   |         |       |       |              |       |
|-------------------|---------|-------|-------|--------------|-------|
| o_Bacteroidales   | NP Baby | 4.227 | 4.227 | <b>0.033</b> | 0.590 |
| f_Alcaligenaceae  | NP Baby | 3.305 | 3.305 | <b>0.034</b> | 0.590 |
| g_Sutterella      | NP Baby | 3.285 | 3.285 | <b>0.034</b> | 0.590 |
| o_Burkholderiales | NP Baby | 3.071 | 3.071 | <b>0.017</b> | 0.590 |

Abbreviations: LDA, linear discriminant analysis; LEfSe, Linear discriminant analysis Effect Size; NP, normotensive pregnancy; HP, hypertensive pregnancy.

*P* values from LEfSe are presented as both unadjusted and adjusted with Benjamini Hochberg correction. Significant *P* values are in bold.

**Supplementary Table 15: Alpha diversity comparison between babies based on maternal smoking status**

| Alpha Diversity Index | Baby (Mum No Smoking)<br>( <i>n</i> = 13) | Baby (Mum Yes Smoking)<br>( <i>n</i> = 5) | <i>P</i><br>value |
|-----------------------|-------------------------------------------|-------------------------------------------|-------------------|
| Shannon's entropy     | 4.299 ± 0.664                             | 4.532 ± 0.713                             | 0.730             |
| Faith's PD            | 12.883 ± 4.945                            | 14.221 ± 5.097                            | 0.730             |
| Pielou's evenness     | 0.644 ± 0.059                             | 0.670 ± 0.085                             | 0.730             |
| Observed OTUs         | 106.923 ± 38.776                          | 109.4 ± 21.801                            | 0.730             |

Abbreviations: PD, phylogenetic diversity; OTU, operational taxonomic unit.

Results are presented as mean ± standard deviation.

*P* values are calculated from Wilcoxon rank sum test with Benjamini Hochberg correction.

**Supplementary Table 16: Alpha diversity comparison between babies based on maternal alcohol intake**

| Alpha Diversity Index | Baby (Mum No Alcohol)<br>( <i>n</i> = 10) | Baby (Mum Yes Alcohol)<br>( <i>n</i> = 8) | <i>P</i><br>value |
|-----------------------|-------------------------------------------|-------------------------------------------|-------------------|
| Observed OTUs         | 125.300 ± 31.411                          | 85.500 ± 24.042                           | 0.058             |
| Shannon's entropy     | 4.659 ± 0.665                             | 3.995 ± 0.476                             | 0.109             |
| Faith's PD            | 14.788 ± 4.351                            | 11.338 ± 5.080                            | 0.194             |
| Pielou's evenness     | 0.671 ± 0.074                             | 0.626 ± 0.046                             | 0.408             |

Abbreviations: PD, phylogenetic diversity; OTU, operational taxonomic unit.

Results are presented as mean ± standard deviation.

*P* values are calculated from Wilcoxon rank sum test with Benjamini Hochberg correction.

**Supplementary Table 17: Alpha diversity comparison between babies based on birth method**

| Alpha Diversity Index | Caesarean Section<br>Delivery Baby ( <i>n</i> = 4) | Vaginal Delivery<br>Baby ( <i>n</i> = 14) | <i>P</i> value |
|-----------------------|----------------------------------------------------|-------------------------------------------|----------------|
| Pielou's evenness     | 0.611 ± 0.041                                      | 0.662 ± 0.068                             | 0.507          |
| Faith's PD            | 10.763 ± 4.103                                     | 13.967 ± 4.972                            | 0.554          |
| Shannon entropy       | 4.057 ± 0.591                                      | 4.452 ± 0.679                             | 0.674          |
| Observed OTUs         | 103.000 ± 34.029                                   | 108.929 ± 35.500                          | 0.958          |

Abbreviations: PD, Phylogenetic Diversity; OTU, operational taxonomic unit.

Results are presented as mean ± standard deviation.

*P* values are calculated from Wilcoxon rank sum test with Benjamini Hochberg correction.

**Supplementary Table 18: Alpha diversity comparison between babies based on feeding method**

| Alpha Diversity Index | Breast Feeding ( <i>n</i> = 8) | Bottle Feeding ( <i>n</i> = 9) | Mix Feeding ( <i>n</i> = 1) | <i>P</i> value Breast-feeding vs Bottle-Feeding | <i>P</i> value Breast-feeding vs Mix-Feeding | <i>P</i> value Bottle-Feeding vs Mix-Feeding |
|-----------------------|--------------------------------|--------------------------------|-----------------------------|-------------------------------------------------|----------------------------------------------|----------------------------------------------|
| Observed OTUs         | 95.625 ± 26.076                | 130.000 ± 40.242               | 115.778                     | 0.411                                           | 0.225                                        | 0.267                                        |
| Pielou's evenness     | 0.636 ± 0.064                  | 0.627 ± 0.071                  | 0.666                       | 0.329                                           | 0.570                                        | 0.297                                        |
| Shannon's entropy     | 4.172 ± 0.650                  | 4.406 ± 0.708                  | 4.531                       | 0.568                                           | 0.561                                        | 0.461                                        |
| Faith's PD            | 14.049 ± 5.505                 | 14.390 ± 4.733                 | 12.422                      | 0.456                                           | 0.725                                        | 0.498                                        |

Abbreviations: PD, Phylogenetic Diversity; OTU, operational taxonomic unit.

Results are presented as mean ± standard deviation.

*P* values are calculated from Kruskal-Wallis test with Dunn's posthoc test and Benjamini Hochberg correction.

**Supplementary Table 19: Alpha diversity comparison in babies based on maternal multivitamin intake during pregnancy**

| Alpha Diversity Index | Baby (Mum No Multivitamin) ( <i>n</i> = 12) | Baby (Mum Yes Multivitamin) ( <i>n</i> = 6) | <i>P</i> value |
|-----------------------|---------------------------------------------|---------------------------------------------|----------------|
| Observed OTUs         | 107.083 ± 39.583                            | 108.667 ± 23.330                            | 0.964          |
| Shannon's entropy     | 4.317 ± 0.680                               | 4.458 ± 0.688                               | 0.964          |
| Pielou's evenness     | 0.646 ± 0.060                               | 0.660 ± 0.080                               | 0.964          |
| Faith's PD            | 12.140 ± 4.693                              | 15.470 ± 4.847                              | 0.852          |

Abbreviations: PD, Phylogenetic Diversity; OTU, operational taxonomic unit.

Results are presented as mean ± standard deviation.

*P* values are calculated from Wilcoxon rank sum test with Benjamini Hochberg correction.

**Supplementary Table 20: PERMANOVA of beta diversity in babies based on Bray Curtis dissimilarities**

| Pair                                                      | Df | SS    | F Model | R <sup>2</sup> | <i>P</i> value |
|-----------------------------------------------------------|----|-------|---------|----------------|----------------|
| Vaginal vs Caesarean-Section Delivery                     | 1  | 0.394 | 1.811   | 0.102          | 0.079          |
| Mix Feeding vs Breast Feeding                             | 1  | 0.404 | 1.828   | 0.109          | 0.213          |
| Mix Feeding vs Bottle Feeding                             | 1  | 0.218 | 0.882   | 0.099          | 1.000          |
| Breast Feeding vs Bottle Feeding                          | 1  | 0.118 | 0.617   | 0.081          | 1.000          |
| Baby (Mum No Smoking) vs Baby (Mum Yes Smoking)           | 1  | 0.214 | 0.934   | 0.055          | 0.455          |
| Baby (Mum No Alcohol) vs Baby (Mum Yes Alcohol)           | 1  | 0.131 | 0.559   | 0.034          | 0.820          |
| Baby (Mum No Multivitamin) vs Baby (Mum Yes Multivitamin) | 1  | 0.074 | 0.311   | 0.019          | 0.975          |

Abbreviations: Df, degrees of freedom; SS, sum of squares; F Model, F value by permutation; R<sup>2</sup>, effect size; PERMANOVA, permutational multivariate analysis of variance. *P* values are from PERMANOVA with Benjamini Hochberg correction based on 999 permutations.

**Supplementary Table 21: Differential genera between babies grouped by maternal multivitamin intake in pregnancy using LEfSe**

| Taxa          | Group with Higher Relative Abundance | LDA Effect Size | LDA Effect Size Revised | Unadjusted <i>P</i> value | FDR adjusted <i>P</i> value |
|---------------|--------------------------------------|-----------------|-------------------------|---------------------------|-----------------------------|
| g_Megasphaera | Yes Multivitamin                     | 3.386           | 3.386                   | <b>0.006</b>              | 0.701                       |
| g_Eubacterium | No Multivitamin                      | 3.294           | -3.294                  | <b>0.045</b>              | 0.701                       |

Abbreviations: LDA, linear discriminant analysis; LEfSe, Linear discriminant analysis Effect Size.

*P* values from LEfSe are presented as both unadjusted and adjusted with Benjamini Hochberg correction. Significant *P* values are in bold.

**Supplementary Table 22: Differential species between babies based grouped by maternal multivitamin intake in pregnancy using LEfSe**

| Taxa                              | Group with Higher Relative Abundance | LDA Effect Size | LDA Effect Size Revised | Unadjusted <i>P</i> value | FDR adjusted <i>P</i> value |
|-----------------------------------|--------------------------------------|-----------------|-------------------------|---------------------------|-----------------------------|
| s_Eubacterium_dolichum            | No Multivitamin                      | 3.273           | -3.273                  | <b>0.045</b>              | 0.669                       |
| s_Megasphaera_unclassified        | Yes Multivitamin                     | 3.598           | 3.5977                  | <b>0.006</b>              | 0.669                       |
| s_Actinobacillus_paraheamolyticus | Yes Multivitamin                     | 3.569           | 3.569                   | <b>0.040</b>              | 0.669                       |
| s_Clostridium_unclassified        | No Multivitamin                      | 3.877           | -3.877                  | <b>0.045</b>              | 0.669                       |

Abbreviations: LDA, linear discriminant analysis; LEfSe, Linear discriminant analysis Effect Size.

*P* values from LEfSe are presented as both unadjusted and adjusted with Benjamini Hochberg correction. Significant *P* values are in bold.



# Supplementary Figure 1

**A**

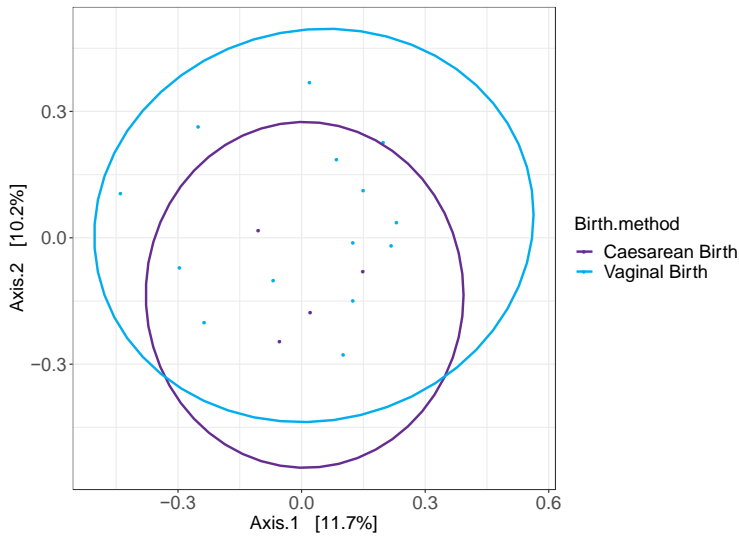

**B**

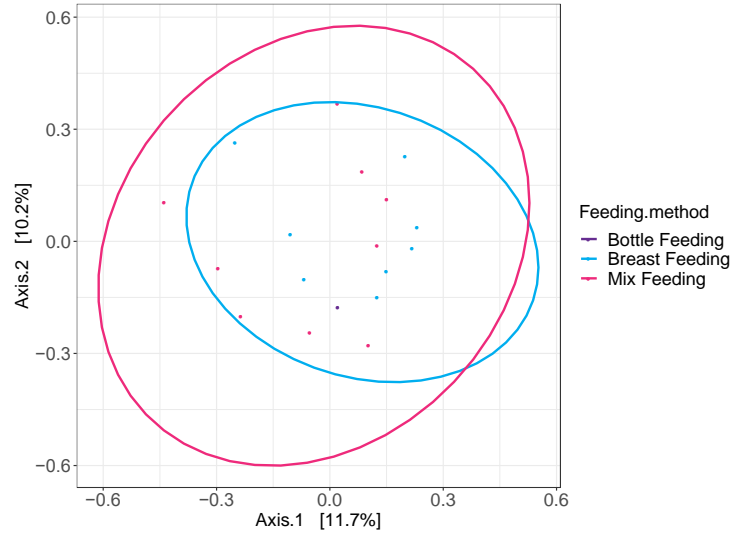

**C**

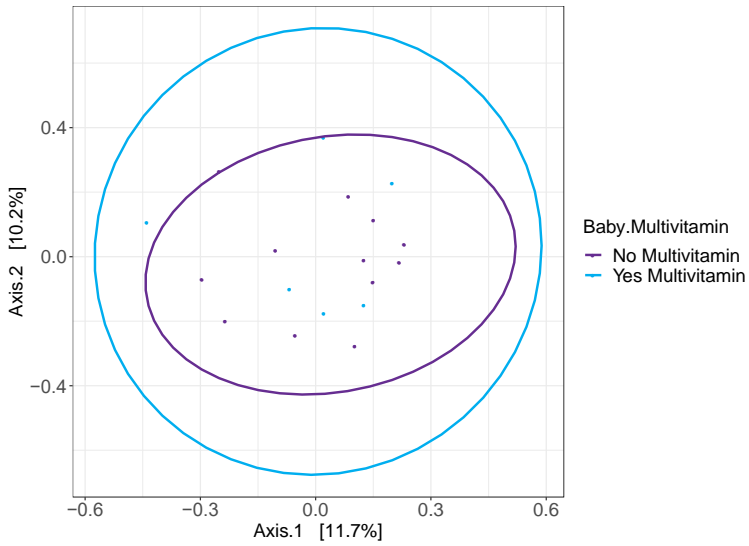

**D**

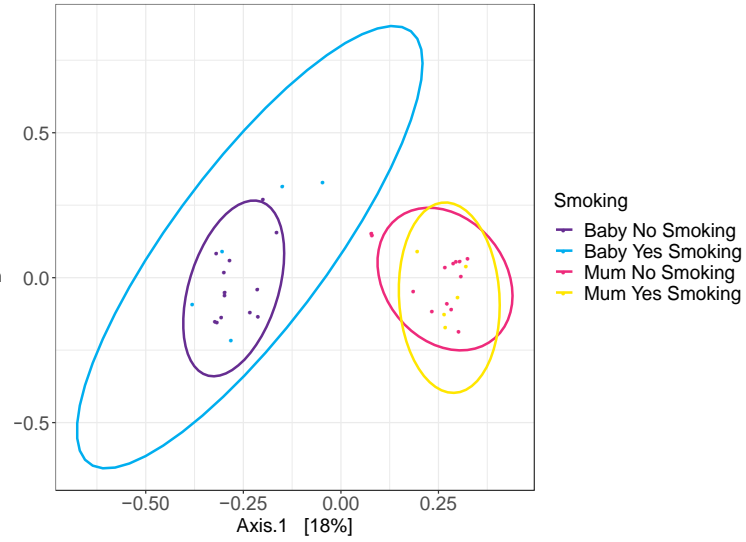

**E**

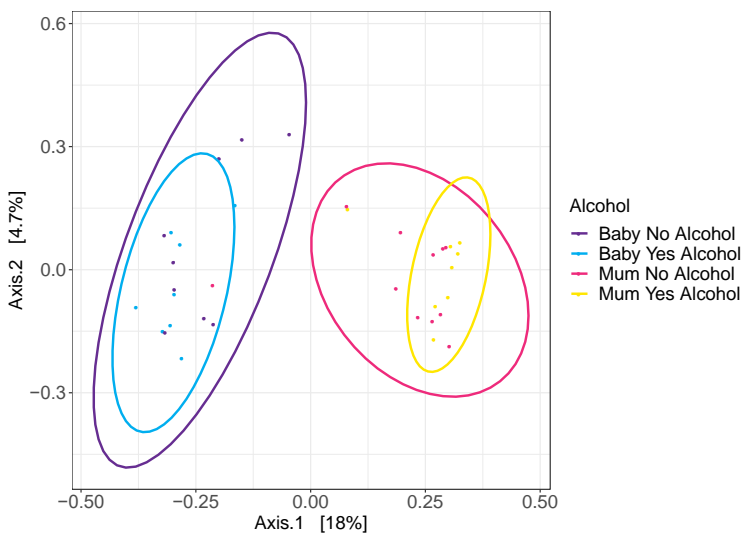

**Supplementary Figure 1.** Principle coordinate analysis (PCoA) plot of microbial communities in mothers and babies. **(A)** PCoA of Bray Curtis distances between babies based on birth method. **(B)** PCoA of Bray Curtis distances between babies based on feeding method. **(C)** PCoA of Bray Curtis distances between babies based on maternal multivitamin intake in pregnancy. **(D)** PCoA of Bray Curtis distances between mothers based on pre-pregnancy and postpartum smoking status, and in babies based on maternal smoking status. **(E)** PCoA of Bray Curtis distances between mothers based on pre-pregnancy and post-partum alcohol intake, and in babies based on maternal alcohol intake. Data points represent individual samples and are colour coded according to their groups. Ellipses indicate the 95% confidence intervals of multivariate normal distribution. The distance between points is representative of similarity or dissimilarity in microbiota composition between samples. The percentage value of each axis represents the amounts of variation it explains. Overall the lack of clustering of points based on each factor assessed indicates that microbiota composition in babies is not significantly grouped according to birth method, feeding method or multivitamin intake. Additionally, microbiota composition in both mothers and babies are not significantly segregated according to smoking status or alcohol intake.
